# Supplementary material for: Codon-triplet context unveils unique features of the Candida albicans protein coding genome
Source: PubMed Central journal article supplement (PMC2244636; doi:10.1186/1471-2164-8-444), 2007-11-29
Supplement: 1471-2164-8-444-S2.pdf [file 1471-2164-8-444-S2.pdf]

**Table S1: RSCU values of *C. albicans*.**

| AA  | codon | RSCU  | AA  | codon | RSCU  |
|-----|-------|-------|-----|-------|-------|
| Lys | AAA   | 1,466 | Trp | TGG   | 1,000 |
| Lys | AAG   | 0,534 | Leu | CTA   | 0,329 |
| Asn | AAC   | 0,558 | Leu | CTC   | 0,158 |
| Asn | AAT   | 1,442 | Leu | CTT   | 0,569 |
| Thr | ACA   | 1,278 | Leu | TTA   | 2,099 |
| Thr | ACC   | 0,763 | Leu | TTG   | 1,844 |
| Thr | ACG   | 0,271 | Pro | CCA   | 2,141 |
| Thr | ACT   | 1,688 | Pro | CCC   | 0,409 |
| Arg | AGA   | 3,342 | Pro | CCG   | 0,284 |
| Arg | AGG   | 0,510 | Pro | CCT   | 1,166 |
| Arg | CGA   | 0,826 | His | CAC   | 0,515 |
| Arg | CGC   | 0,149 | His | CAT   | 1,485 |
| Arg | CGG   | 0,206 | Gln | CAA   | 1,657 |
| Arg | CGT   | 0,966 | Gln | CAG   | 0,343 |
| Ser | AGC   | 0,394 | Val | GTA   | 0,721 |
| Ser | AGT   | 1,389 | Val | GTC   | 0,585 |
| Ser | CTG   | 0,337 | Val | GTG   | 0,770 |
| Ser | TCA   | 2,104 | Val | GTT   | 1,925 |
| Ser | TCC   | 0,687 | Ala | GCA   | 1,291 |
| Ser | TCG   | 0,540 | Ala | GCC   | 0,799 |
| Ser | TCT   | 1,549 | Ala | GCG   | 0,194 |
| Ile | ATA   | 0,765 | Ala | GCT   | 1,717 |
| Ile | ATC   | 0,551 | Gly | GGA   | 1,148 |
| Ile | ATT   | 1,684 | Gly | GGC   | 0,352 |
| Met | ATG   | 1,000 | Gly | GGG   | 0,598 |
| Phe | TTC   | 0,638 | Gly | GGT   | 1,902 |
| Phe | TTT   | 1,362 | Asp | GAC   | 0,449 |
| Tyr | TAC   | 0,549 | Asp | GAT   | 1,551 |
| Tyr | TAT   | 1,451 | Glu | GAA   | 1,587 |
| Cys | TGC   | 0,359 | Glu | GAG   | 0,413 |
| Cys | TGT   | 1,641 |     |       |       |

RSCU values were calculated as explained by Sharp and Li [24], using all genes of *C. albicans*. For the calculations, CTG was considered a serine codon.
